# Supplementary material for: ﻿Metabarcoding of insect-associated fungal communities: a comparison of internal transcribed spacer (ITS) and large-subunit (LSU) rRNA markers
Source: MycoKeys. 2022 Mar 8;88:1–33. doi: 10.3897/mycokeys.88.77106 (PMC8924126; doi:10.3897/mycokeys.88.77106)
Supplement: Supplementary material 5 — Table S1. Accession numbers corresponding with the reference sequences used to build the phylogenetic trees [file mycokeys-88-001-s005.xlsx]

## Sheet: Hoja1
Taxon	SSU	LSU	ITS2	Order
Ambrosiella xylebori	DQ471031	DQ470979	NR 144921.1	Microascales
Anthostomella torosa	DQ836895	DQ836902		Xylariales
Apiognomonia errabunda	DQ862045	AF408334	DQ313524.1	Diaporthales
Balansia henningsiana	AY489683	AY489715	U57404.1	Hypocreales
Bionectria ochroleuca	AY489684	AY489176	NR 165993.1	Hypocreales
Bombardia bombarda	DQ471021	DQ470970		Sordariales
Calosphaeria pulchella	AY761071.1	JX876611.1	MN315571.1	Calosphaerales
Camarops microspora	DQ471036	AY083821		Boliniales
Camarops ustulinoides	DQ470989	DQ470941	AY908991	Boliniales
Ceratocystiopsis rollhanseniana	HQ634834.1	DQ294362.1	EU913719.1	Ophiostomatales
Ceratocystis fimbriata	U32418	U17401	AM292204.1	Microascales
Chaetosphaeria myriocarpa		AF466076.1	MH857668.1	Chaetosphaeriales
Chromendothia citrina	DQ862046	AF408335	MK510674	Diaporthales
Claviceps purpurea	AF543765	AF543789	AB371642.1	Hypocreales
Coniochaetidium ostrea	DQ471007	DQ470959	NR 159772	Coniochaetales
Cordyceps capitate	AY489689	AY489721		Hypocreales
Cordyceps cardinalis	AY184973	AY184962	HQ330978.1	Hypocreales
Cordyceps ophioglossoides	AY489691	AY489723	AF199593.1	Hypocreales
Corynascus verrucosus	0587332.1	KP671733.1	MK632015.1	Sordariales
Cryphonectria cubensis	DQ862047	AF408338	NR 119578.1	Diaporthales
Cryphonectria parasitica	DQ862048	AY141856	AY141855.1	Diaporthales
Cryptodiaporthe aesculi	DQ836899	DQ836905	DQ313557.1	Diaporthales
Cryptosporella hypodermia	DQ862049	DQ862028		Diaporthales
Diaporthe eres	DQ471015	AF408350	NR 144923.1	Diaporthales
Diaporthe phaseolorum	L36985	1347830	AY857867.1	Diaporthales
Diatrype disciformis	DQ471012	DQ470964	AJ390410.1	Xylariales
Dictyochaeta ellipsoidea	MK834741.1	MK835826.1	MK828629.1	Chaetosphaeriales
Doratomyces stemonitis	DQ836901	DQ836907	NR 146261.1	Microascales
Endothia gyrosa	DQ836898	DQ470972	0225530.1	Diaporthales
Epichlöe typhina	U32405	U17396	107133.1	Hypocreales
Eutypa lata	DQ836896	DQ836903	AF455427.1	Xylariales
Gelasinospora tetrasperma	DQ471032	DQ470980	NR 077163.1	Sordariales
Gnomonia gnomon	DQ471019	AF408361	AY818954.1	Diaporthales
Graphilbum fragrans	AB007656.1	MH868872.1	MH283082.1	Ophiostomatales
Graphium album	AB007657.1	MH866407.1	MH854913.1	Ophiostomatales
Haematonectria haematococca	AY489697	AY489729	NR 163531.1	Hypocreales
Humicola grisea	AY706334.1	MH866153.1	MH855491.1	Sordariales
Hydropisphaera erubescens	AY545722	AY545726	591544.1/FJ9698C	Hypocreales
Hypocrea lutea	AF543768	AF543791	NR 134394.1	Hypocreales
Jattaea algeriensis	EU367462.1	EU367456.1	MG456724.1	Calosphaerales
Jattaea mookgoponga	NG 064917.1	MN796060.1	MN809170.1	Calosphaerales
Leucostoma niveum	DQ862050	AF362558	AF191174.1	Diaporthales
Mazzantia napelli	DQ862051	AF408368		Diaporthales
Melanconis alni	DQ862052	AF408371	DQ323523.1	Diaporthales
Melanconis marginalis	DQ862053	AF408373	NR 154218.1	Diaporthales
Melanconis stilbostoma	DQ862054	AF408374	AY577811.1	Diaporthales
Menispora tortuosa	AY544723	AY544682	AF178558.1	Chaetosphaeriales
Microascus longirostris	DQ471026	AF400865	NR 132945.1	Microascales
Microascus trigonosporus	DQ471006	DQ470958	NR 136145.1	Microascales
Myrmecridium aquaticum	MK828322.1	MK849803.1	MK828657.1	Myrmecridiales
Myrmecridium iridis		KR476777.1	NR 156299.1	Myrmecridiales
Myrmecridium schulzeri	KP968557.1	EU041828.1	MT446206.1	Myrmecridiales
Myrothecium roridum	AY489676	AY489708	NR 145077.1	Hypocreales
Nectria cinnabarina	U32412	U00748	KU516528.1	Hypocreales
Neomyrmecridium guizhouense	NG 068427.1	MT002307.1	NR 170024.1	Myrmecridiales
Neomyrmecridium septatum		MK047492.1	NR 161133.1	Myrmecridiales
Neurospora crassa	X04971	AF286411	AF388914.1	Sordariales
Niesslia exilis	AY489688	AY489720		Hypocreales
Ophiostoma minus	HQ634821.1	MH867251.1	AY542496.1	Ophiostomatales
Ophiostoma piliferum	DQ471003	DQ470955	AF221070.1	Ophiostomatales
Ophiostoma stenoceras	DQ836897	DQ836904	AY280491.1	Ophiostomatales
Peethambara spirostriata	AY489692	AY489724	KU847244.1	Hypocreales
Petriella setifera	DQ471020	DQ470969	AJ784398.1	Microascales
Plagiostoma euphorbiae	DQ862055	AF408382	DQ323532.1	Diaporthales
Pleurostomophora richardsiae	AY761066.1	AY761080.1	MK267909.1	Calosphaerales
Pseudolachnea hispidula	MT214984.1	AB934047.1	MT 185550.1	Chaetosphaeriales
Pseudolachnella longiciliata		AB934057.1	NR 154281.1	Chaetosphaeriales
Pseudonectria rousseliana	AF543767	1117416	JF937563.1	Hypocreales
Raffaelea brunnea	MF398180.1	MN012912.1		Ophiostomatales
Roumegueriella rufula	DQ522561	DQ518776		Hypocreales
Seynesia erumpens	AF279409	AF279410		Xylariales
Sphaerostilbella berkeleyana	AF543770	U00756	KT225525	Hypocreales
Sporoschisma hemipsilum	MK834734.1	MK835816.1	KX455866.1	Chaetosphaeriales
Stachybotrys chlorohalonata	AY489680	AY489712	NR 145083.1	Hypocreales
Stachybotrys subsimplex	AY489679	AY489711	AF205440.1	Hypocreales
Tainosphaeria jonesii		KY026056.1	MN121308.1	Chaetosphaeriales
Thielavia australiensis	NG 064993.1	NG 067525.1	AJ271590.1	Sordariales
Togniniella acerosa	NG 061029.1	KT716461.1	MH862941.1	Calosphaerales
Trichocladium asperum	MW092549.1	KY853535.1	MH854731.1	Sordariales
Valsa ambiens	DQ862056	AF362564	AY347330.1	Diaporthales
Valsella salicis	DQ862057	AF408389		Diaporthales
Xylaria acuta	AY544719	AY544676	AF163026.1	Xylariales
Xylaria hypoxylon	AY544692	AY544648	AF201711.1	Xylariales
