# Supplementary material for: ﻿Metabarcoding of insect-associated fungal communities: a comparison of internal transcribed spacer (ITS) and large-subunit (LSU) rRNA markers
Source: MycoKeys. 2022 Mar 8;88:1–33. doi: 10.3897/mycokeys.88.77106 (PMC8924126; doi:10.3897/mycokeys.88.77106)
Supplement: Supplementary material 7 — Table S3. Number of OTUs assigned to each order based on RDP Bayesian classifier [file mycokeys-88-001-s007.xlsx]

## Sheet: Sup-S2
LSU	Xylariales	Myrmecridiales	Ophiostomatales	Calosphaeriales	Diaporthales	Sordariales	Chaetosphaeriales	Microascales	Hypocreales	Coniochaetales	Lulworthiales	Coronophorales	Phyllacorales	Boliniales	Unclassified Sordariomycetes
0.97	10	0	4	2	3	1	5	4	25	0	0	1	1	0	24
0.98	12	0	6	2	6	1	5	5	36	0	0	1	1	0	27
0.99	19	0	7	3	9	1	5	7	66	0	0	1	1	0	31
Average confidence	0.79	n/a	0.61	0.98	0.74	0.41	0.98	0.79	0.8	n/a	n/a	0.97	0.93	n/a	n/a
ITS2	Xylariales	Myrmecridiales	Ophiostomatales	Calosphaeriales	Diaporthales	Sordariales	Chaetosphaeriales	Microascales	Hypocreales	Coniochaetales	Lulworthiales	Coronophorales	Phyllacorales	Boliniales	Unclassified Sordariomycetes
0.97	26	0	6	3	16	5	3	5	45	2	4	0	0	1	22
0.98	27	0	6	3	18	5	3	5	47	2	4	0	0	1	23
0.99	32	0	6	4	19	5	3	5	51	2	5	0	0	1	25
Average confidence	0.9	n/a	0.93	0.99	0.96	0.8	0.99	0.99	0.92	1	0.94	n/a	n/a	0.79	n/a

## Sheet: Sup-S2-Op2
LSU	0.97	0.98	0.99	Average confidence	ITS2	0.97	0.98	0.99	Average confidence
Xylariales	10	12	19	0.79	Xylariales	26	27	32	0.9
Myrmecridiales	0	0	0	n/a	Myrmecridiales	0	0	0	n/a
Ophiostomatales	4	6	7	0.61	Ophiostomatales	6	6	6	0.93
Calosphaeriales	2	2	3	0.98	Calosphaeriales	3	3	4	0.99
Diaporthales	3	6	9	0.74	Diaporthales	16	18	19	0.96
Sordariales	1	1	1	0.41	Sordariales	5	5	5	0.8
Chaetosphaeriales	5	5	5	0.98	Chaetosphaeriales	3	3	3	0.99
Microascales	4	5	7	0.79	Microascales	5	5	5	0.99
Hypocreales	25	36	66	0.8	Hypocreales	45	47	51	0.92
Coniochaetales	0	0	0	n/a	Coniochaetales	2	2	2	1
Lulworthiales	0	0	0	n/a	Lulworthiales	4	4	5	0.94
Coronophorales	1	1	1	0.97	Coronophorales	0	0	0	n/a
Phyllacorales	1	1	1	0.93	Phyllacorales	0	0	0	n/a
Boliniales	0	0	0	n/a	Boliniales	1	1	1	0.79
Unclassified Sordariomycetes	24	27	31	n/a	Unclassified Sordariomycetes	22	23	25	n/a

## Sheet: Sup-S2-Op3
		LSU				ITS2
Order	0.97	0.98	0.99	Average confidence	0.97	0.98	0.99	Average confidence
Xylariales	10	12	19	0.79	26	27	32	0.9
Myrmecridiales	0	0	0	n/a	0	0	0	n/a
Ophiostomatales	4	6	7	0.61	6	6	6	0.93
Calosphaeriales	2	2	3	0.98	3	3	4	0.99
Diaporthales	3	6	9	0.74	16	18	19	0.96
Sordariales	1	1	1	0.41	5	5	5	0.8
Chaetosphaeriales	5	5	5	0.98	3	3	3	0.99
Microascales	4	5	7	0.79	5	5	5	0.99
Hypocreales	25	36	66	0.8	45	47	51	0.92
Coniochaetales	0	0	0	n/a	2	2	2	1
Lulworthiales	0	0	0	n/a	4	4	5	0.94
Coronophorales	1	1	1	0.97	0	0	0	n/a
Phyllacorales	1	1	1	0.93	0	0	0	n/a
Boliniales	0	0	0	n/a	1	1	1	0.79
Unclassified Sordariomycetes	24	27	31	n/a	22	23	25	n/a

## Sheet: table3
	ITS					LSU
	0.97	0.98	0.99	Mixed	0.97	0.98	0.99	Mixed
NRI	-0.111	-0.805	1.497	-0.122	1.328	0.697	-2.55	-0.653
NTI	-1.212	-3.81	-2.386	-2.277	1.367	0.882	-0.183	-1.343
OTU count	138	144	158	144	80	102	150	150
